# Supplementary material for: Humidity-driven divergence and extremes in global air-conditioning energy response under climate change
Source: Research Square preprint supplement (doi:10.21203/rs.3.rs-8321521/v1), 2026-01-07
Supplement: Supplementary file 1 [file c9ed6a110b918583a166a6e9.pdf]

**Humidity-driven divergence and extremes in global air-conditioning energy response  
under climate change**

Xinchang “Cathy” Li<sup>1,2\*</sup>, Lei Zhao<sup>2,3,4\*</sup>, Zhiwen Luo<sup>5</sup>, Keith Oleson<sup>6</sup>, Yifan Cheng<sup>2</sup>, Xiaoxiong Xie<sup>7</sup>,  
Alvin C.G. Varquez<sup>8</sup>, Mitsuna Sekiya<sup>8</sup>

<sup>1</sup> Pacific Northwest National Laboratory, Richland, WA, USA;

<sup>2</sup> Department of Civil and Environmental Engineering, University of Illinois Urbana-Champaign, Urbana,  
IL, USA;

<sup>3</sup> National Center for Supercomputing Applications, University of Illinois Urbana-Champaign, Urbana,  
IL, USA

<sup>4</sup> Institute for Sustainability, Energy, and Environment (iSEE), University of Illinois Urbana-Champaign,  
Urbana, IL, USA

<sup>5</sup> Welsh School of Architecture, Cardiff University, Cardiff, UK;

<sup>6</sup> Climate and Global Dynamics Laboratory, NSF National Center for Atmospheric Research, Boulder,  
CO, USA;

<sup>7</sup> School of Art, Design and Architecture, University of Plymouth, Plymouth, UK;

<sup>8</sup> Department of Transdisciplinary Science and Engineering, Institute of Science Tokyo, Tokyo, Japan.

\*emails: [xinchang.li@pnnl.gov](mailto:xinchang.li@pnnl.gov); [leizhao@illinois.edu](mailto:leizhao@illinois.edu)

**Contents of this file:**

Supplementary Text 1

Supplementary Tables 1 and 2

References

## Supplementary Text 1 | Deriving AC energy use fractions

To obtain anthropogenic heat flux (AHF) due to AC for validation, we follow a similar procedure as described in ref.<sup>1</sup> We start with a gridded AHF dataset, then multiply it with the country- or region-specific fractions of AC energy use over total energy consumption, which we define as AC energy use fractions ( $f$ ). In this study, we collaborated with the authors of Varquez et al. dataset<sup>2</sup> and obtained an updated AHF dataset, which represents AHF from the commercial, residential, and transport sectors only. This is one of the components that make up the original Varquez et al. dataset. This allowed us to correct some of the biases introduced from industry or point sources (such as power plants) that lead to high AHF on sparsely built/populated areas.

Because of this change, the AC energy fractions now need to represent AC energy use as a fraction of commercial, residential, and transport energy consumption. Therefore, we modify the calculations to reflect this change as well as leverage updated versions of the relevant datasets, as detailed below.

Country-level data come from two free IEA datasets in their latest versions: 1) Energy Efficiency Indicators Highlights (EEI) November 2023 edition (<https://www.iea.org/data-and-statistics/data-product/energy-efficiency-indicators-highlights>), which contains final end-use energy consumption that includes AC energy consumption for residential and commercial sectors for select countries; and 2) World Energy Balances Highlights (WEB) 2024 edition (<https://www.iea.org/data-and-statistics/data-product/world-energy-balances-highlights>), which contains annual sectoral total energy consumption for select countries. A total of 15 countries/regions (including the U.S.) have AC energy consumption data in EEI. These countries/regions are: United States, South Korea, Germany, Japan, France, Portugal, New Zealand, Italy, Morocco, Netherlands, Canada, Spain, Uruguay, Taiwan, and Hong Kong. The  $f$  for the 14 countries/regions excluding the U.S. are calculated as:

$$f = \frac{E_{AC,res} + E_{AC,com}}{E_{res} + E_{com} + E_{tra}}, \quad (S1)$$

where  $E_{AC,res}$  and  $E_{AC,com}$  are average annual AC energy consumption for residential and commercial sectors, respectively, obtained from EEI, and  $E_{res}$ ,  $E_{com}$ , and  $E_{tra}$  are average annual total energy

consumption for residential, commercial, and transport sectors, respectively, obtained from WEB. The average is computed for 2010 – 2019 ignoring missing years.

For the U.S., we compute  $f$  for each state by leveraging U.S. subnational-level data from three EIA datasets: 1) 2015 Residential Energy Consumption Survey (RECS) (<https://www.eia.gov/consumption/residential/data/2015/>), which include the annual final end-use (including AC) energy consumption in the residential sector at the census division level (the 50 U.S. states are grouped into 9 census divisions); 2) 2018 Commercial Buildings Energy Consumption Survey (CBECS) (<https://www.eia.gov/consumption/commercial/data/2018/>), which include the annual final end-use (including AC) energy consumption in the commercial sector at the census division level, and 3) 2022 State Profiles and Energy Estimates (<https://www.eia.gov/state/>), which include annual total primary energy consumption for all sectors (including residential, commercial, transportation, and industrial) at the state level.

We combine the three datasets and calculate  $f$  for each state as:

$$f = \frac{E'_{AC,res}}{E'_{res}} \cdot \frac{E_{res}}{E_{crt,tot}} + \frac{E'_{AC,com}}{E'_{com}} \cdot \frac{E_{com}}{E_{crt,tot}}, \quad (S2)$$

where  $E_{crt,tot}$  is annual total energy consumption for commercial, residential, and transport sectors, and the prime symbol denotes the census-division value of the respective quantity is used. In this equation,  $\frac{E'_{AC,res}}{E'_{res}}$  is calculated from 2015 RECS for each census division,  $\frac{E'_{AC,com}}{E'_{com}}$  is calculated from 2018 CBECS for each census division, and  $\frac{E_{res}}{E_{crt,tot}}$  and  $\frac{E_{com}}{E_{crt,tot}}$  are calculated from 2022 State Profiles and Energy Estimates for each state. This allows us to obtain state-level estimates of  $f$  by leveraging census-division level statistics where state-level information is missing.

**Supplementary Table 1 | The U-Surf dataset<sup>3</sup> helps correct anthropogenic heat overestimation.** The observed value is derived from the Varquez et al. dataset<sup>2</sup>, following ref.<sup>4</sup> Both simulations are run with the original modeling scheme (i.e., no dehumidification), with the same urban extent as defined in U-Surf. The AHF result for default surface data is much larger than that presented in ref.<sup>4</sup> because the urban extent in U-Surf is used, which is much larger than the default urban extent used in ref.<sup>4</sup>

| Annual average global total AHF due to heating and air conditioning for 2010 – 2014 | Value (terawatts) |
|-------------------------------------------------------------------------------------|-------------------|
| Observed estimates (derived from ref. <sup>2</sup> )                                | 3.1               |
| Simulated with default surface data                                                 | 9.7               |
| Simulated with U-Surf                                                               | 3.3               |

**Supplementary Table 2 | Condensate produced from the new dehumidification scheme has minimal effect on river flow.** Annual average volumetric flow rates of world's 50 largest rivers simulated under the new dehumidification scheme and under the original scheme for 2081 – 2100, and the increase due to condensate from dehumidification. The simulation run under the original scheme is otherwise identical to the one analyzed in the study.

| No. | River Name  | Station,<br>country         | Volumetric flow rate (km <sup>3</sup> yr <sup>-1</sup> ) |                                          | Increase<br>due to new<br>scheme<br>(m <sup>3</sup> yr <sup>-1</sup> ) | Relative<br>increase<br>due to new<br>scheme<br>(%) |
|-----|-------------|-----------------------------|----------------------------------------------------------|------------------------------------------|------------------------------------------------------------------------|-----------------------------------------------------|
|     |             |                             | New scheme (with<br>dehumidification)                    | Original scheme (no<br>dehumidification) |                                                                        |                                                     |
| 1   | Amazon      | Obidos,<br>Brazil           | 2922.365                                                 | 2922.363                                 | 2000                                                                   | 0.000%                                              |
| 2   | Congo       | Kinshasa,<br>Congo          | 2763.163                                                 | 2763.162                                 | 1000                                                                   | 0.000%                                              |
| 3   | Orinoco     | Pte Angostu,<br>Venezuela   | 764.246                                                  | 764.244                                  | 2000                                                                   | 0.000%                                              |
| 4   | Changjiang  | Datong,<br>China            | 1766.562                                                 | 1766.52                                  | 42000                                                                  | 0.002%                                              |
| 5   | Brahmaputra | Bahadurabad<br>, Bangladesh | 1254.887                                                 | 1254.887                                 | 0                                                                      | 0.000%                                              |
| 6   | Mississippi | Vicksburg,<br>MS, USA       | 712.012                                                  | 711.99                                   | 22000                                                                  | 0.003%                                              |
| 7   | Yenisey     | Igarka,<br>Russia           | 820.19                                                   | 820.19                                   | 0                                                                      | 0.000%                                              |
| 8   | Parana      | Timbues,<br>Argentina       | 748.066                                                  | 748.046                                  | 20000                                                                  | 0.003%                                              |
| 9   | Lena        | Kusur,<br>Russia            | 781.819                                                  | 781.819                                  | 0                                                                      | 0.000%                                              |
| 10  | Mekong      | Pakse, Laos                 | 412.121                                                  | 412.112                                  | 9000                                                                   | 0.002%                                              |
| 11  | Tocantins   | Tucurui,<br>Brazil          | 497.262                                                  | 497.261                                  | 1000                                                                   | 0.000%                                              |
| 12  | Tapajos     | Jatoba,<br>Brazil           | 167.063                                                  | 167.063                                  | 0                                                                      | 0.000%                                              |
| 13  | Ob          | Salekhard,<br>Russia        | 394.439                                                  | 394.439                                  | 0                                                                      | 0.000%                                              |
| 14  | Ganges      | Farakka,<br>India           | 389.709                                                  | 389.699                                  | 10000                                                                  | 0.003%                                              |
| 15  | Irrawaddy   | Sagaing,<br>Myanmar(Burma)  | 273.883                                                  | 273.883                                  | 0                                                                      | 0.000%                                              |
| 16  | St Lawrence | Cornwall<br>ON, Canada      | 369.235                                                  | 369.227                                  | 8000                                                                   | 0.002%                                              |
| 17  | Amur        | Komsomolsk,<br>Russia       | 610.788                                                  | 610.786                                  | 2000                                                                   | 0.000%                                              |
| 18  | Xingu       | Altamira,<br>Brazil         | 71.389                                                   | 71.389                                   | 0                                                                      | 0.000%                                              |
| 19  | Mackenzie   | Arctic Red,<br>Canada       | 462.492                                                  | 462.492                                  | 0                                                                      | 0.000%                                              |
| 20  | Xijiang     | Wuzhou,<br>China            | 223.535                                                  | 223.525                                  | 10000                                                                  | 0.004%                                              |

|    |                    |                                   |         |         |      |        |
|----|--------------------|-----------------------------------|---------|---------|------|--------|
| 21 | Columbia           | The Dalles,<br>OR, USA            | 226.26  | 226.26  | 0    | 0.000% |
| 22 | Magdalena          | Calamar,<br>Colombia              | 304.675 | 304.675 | 0    | 0.000% |
| 23 | Uruguay            | Concordia,<br>Argentina           | 154.975 | 154.973 | 2000 | 0.001% |
| 24 | Yukon              | Pilot Stn,<br>AK, USA             | 471.407 | 471.407 | 0    | 0.000% |
| 25 | Atrato             | Tagachi,<br>Colombia              | 53.659  | 53.659  | 0    | 0.000% |
| 26 | Danube             | Ceatal Izma,<br>Romania           | 112.84  | 112.84  | 0    | 0.000% |
| 27 | Niger              | Gaya, Niger                       | 23.328  | 23.328  | 0    | 0.000% |
| 28 | Ogooue             | Lambarene,<br>Gabon               | 209.895 | 209.895 | 0    | 0.000% |
| 29 | Essequibo          | Plantain Is,<br>Guyana            | 25.853  | 25.853  | 0    | 0.000% |
| 30 | Fraser             | Hope,<br>Canada                   | 136.536 | 136.536 | 0    | 0.000% |
| 31 | Pechora            | Oksino,<br>Russia                 | 144.516 | 144.516 | 0    | 0.000% |
| 32 | Nelson             | Upstream of<br>Bladder,<br>Canada | 1.74    | 1.74    | 0    | 0.000% |
| 33 | Khatanga           | Khatanga,<br>Russia               | 116.48  | 116.48  | 0    | 0.000% |
| 34 | Sepik              | Ambunti,<br>Papua New<br>Guinea   | 240.695 | 240.695 | 0    | 0.000% |
| 35 | Kolyma             | Kolymskoye<br>, Russia            | 236.808 | 236.808 | 0    | 0.000% |
| 36 | Zambeze            | Matundo-<br>Cai,<br>Mozambique    | 17.074  | 17.074  | 0    | 0.000% |
| 37 | Severnaya<br>Dvina | Ust Pinega,<br>Russia             | 110.673 | 110.673 | 0    | 0.000% |
| 38 | Indus              | Kotri,<br>Pakistan                | 0.22    | 0.22    | 0    | 0.000% |
| 39 | Sanaga             | Edea,<br>Cameroon                 | 115.492 | 115.492 | 0    | 0.000% |
| 40 | Godavari           | Polavaram,<br>India               | 105.002 | 104.999 | 3000 | 0.003% |
| 41 | Rajang             | Kapit Wharf,<br>Malaysia          | 120.749 | 120.749 | 0    | 0.000% |
| 42 | Sao Francisco      | Traipu,<br>Brazil                 | 263.106 | 263.104 | 2000 | 0.001% |
| 43 | Usumacinta         | Boca del Ce,<br>Mexico            | 7.725   | 7.725   | 0    | 0.000% |
| 44 | Maroni             | Langa<br>Tabbe,<br>Suriname       | 12.332  | 12.332  | 0    | 0.000% |

|    |             |                                  |         |         |      |        |
|----|-------------|----------------------------------|---------|---------|------|--------|
| 45 | Rhine       | Lobith,<br>Netherlands           | 61.687  | 61.687  | 0    | 0.000% |
| 46 | Purari      | Wabo Dam,<br>Papua New<br>Guinea | 173.323 | 173.323 | 0    | 0.000% |
| 47 | Caniapiscou | Chute de la,<br>Canada           | 25.225  | 25.225  | 0    | 0.000% |
| 48 | Mahanadi    | Kaimundi,<br>India               | 32.574  | 32.574  | 0    | 0.000% |
| 49 | Sacramento  | Sacramento,<br>CA, USA           | 23.848  | 23.848  | 0    | 0.000% |
| 50 | Jacui       | Passo do Ra,<br>Brazil           | 58.025  | 58.024  | 1000 | 0.002% |

## References

1. Li, X. “Cathy” *et al.* Enhancing Urban Climate-Energy Modeling in the Community Earth System Model (CESM) Through Explicit Representation of Urban Air-Conditioning Adoption. *Journal of Advances in Modeling Earth Systems* **16**, e2023MS004107 (2024).
2. Varquez, A. C. G., Kiyomoto, S., Khanh, D. N. & Kanda, M. Global 1-km present and future hourly anthropogenic heat flux. *Scientific Data* **8**, 64 (2021).
3. Cheng, Y. *et al.* U-Surf: a global 1 km spatially continuous urban surface property dataset for kilometer-scale urban-resolving Earth system modeling. *Earth System Science Data* **17**, 2147–2174 (2025).
4. Oleson, K. W. & Feddema, J. Parameterization and Surface Data Improvements and New Capabilities for the Community Land Model Urban (CLMU). *Journal of Advances in Modeling Earth Systems* e2018MS001586 (2020) doi:<https://doi.org/10.1029/2018MS001586>.
